# Supplementary material
Source: PubMed Central journal article supplement (PMC6701194)
Supplement: mmc1.pdf [file mmc1.pdf]

**Biophysical Journal, Volume 117**

**Supplemental Information**

**Phosphatidylinositol 4,5 Bisphosphate Controls the *cis* and *trans* Interactions of Synaptotagmin 1**

**Sarah B. Nyenhuis, Anusa Thapa, and David S. Cafiso**

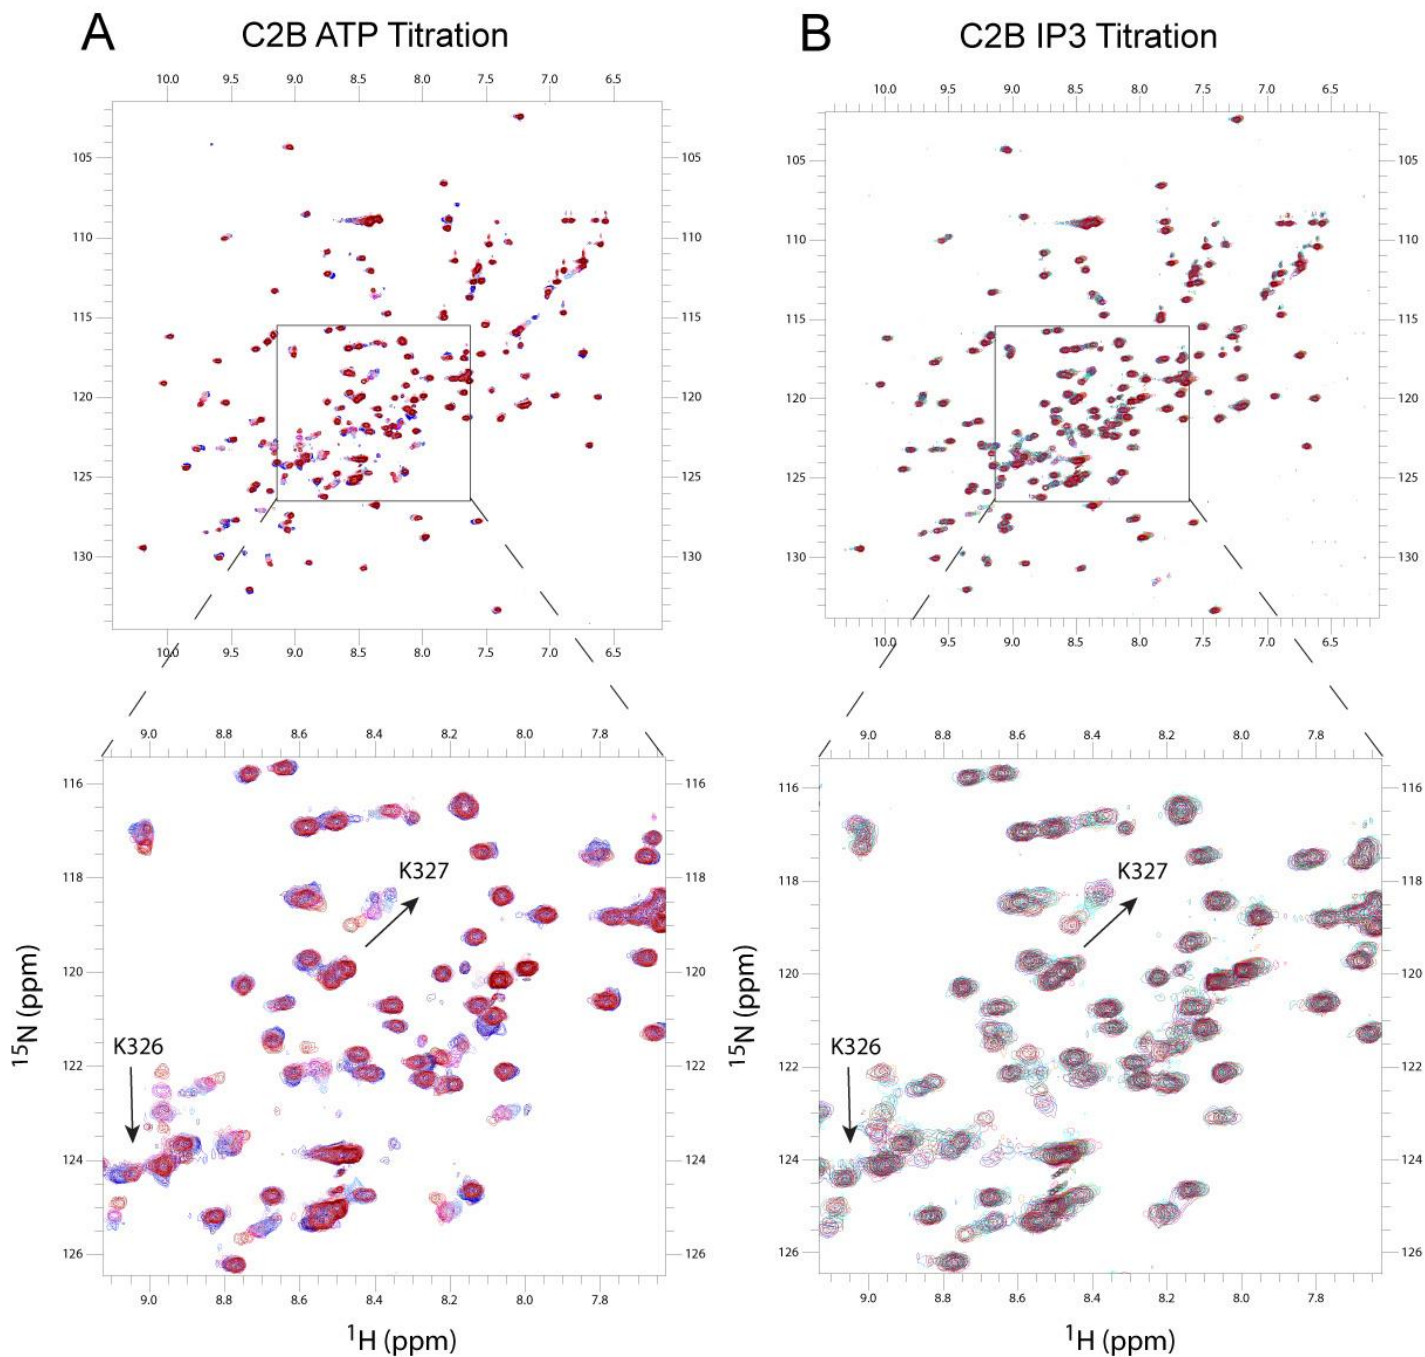

**Figure S1.** HSQC plots and chemical shift changes with ATP (A) or IP<sub>3</sub> (B) addition. ATP was titrated at concentrations: 0 mM, 0.2 mM, 0.3 mM, 0.35 mM, 0.4 mM, 0.6 mM, 0.8 mM, 1.0 mM, 1.5 mM, 2.0 mM, 3 mM, and 5 mM in the presence of C2B. IP<sub>3</sub> was titrated at concentrations: 0 mM, 0.001 mM, 0.0015 mM, 0.002 mM, 0.0025 mM, 0.005 mM, 0.0075 mM, 0.00875 mM, 0.01 mM, 0.02 mM, 0.03 mM, 0.05 mM, 0.1 mM, 0.2 mM, 0.5 mM, and 1 mM. The arrows highlight the direction of chemical shifts two lysine residues in the polybasic face at sites 326 and 327.

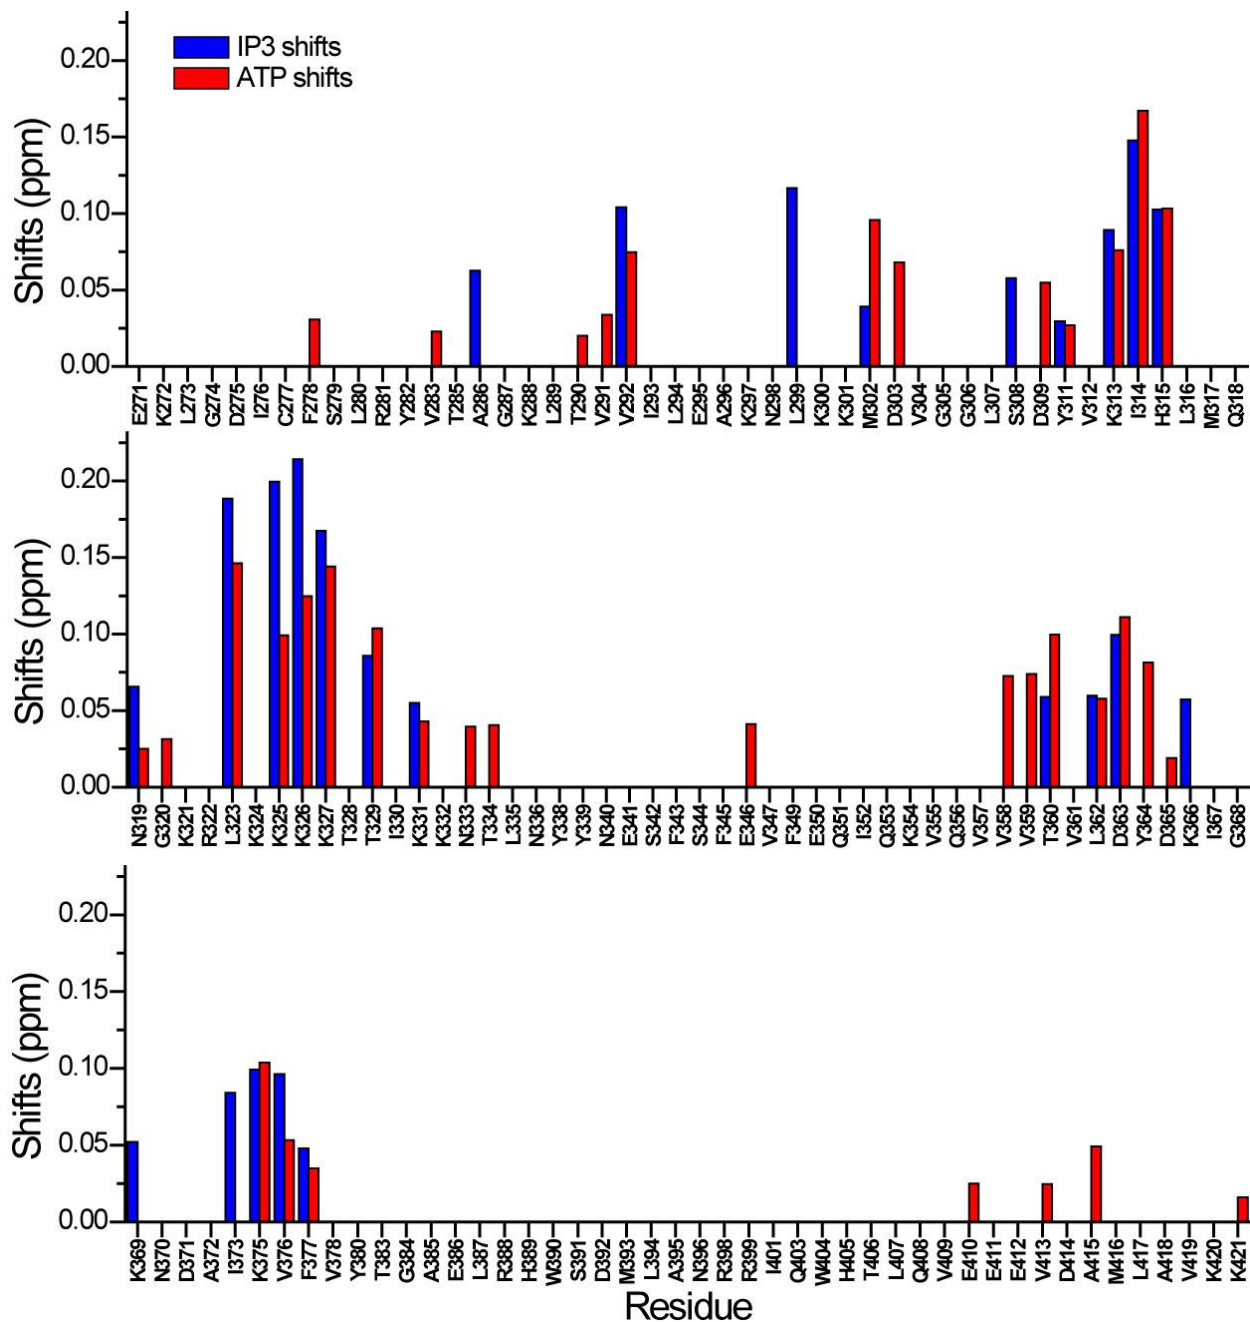

**Figure S2.** HSQC plots and chemical shift changes with IP<sub>3</sub> or ATP addition. The bar chart shows the average weighted chemical shift changes ( $\Delta H_N, N$ ) at each residue position in sC2B with the addition of either 5 mM ATP (red) 1 mM IP<sub>3</sub> (blue).

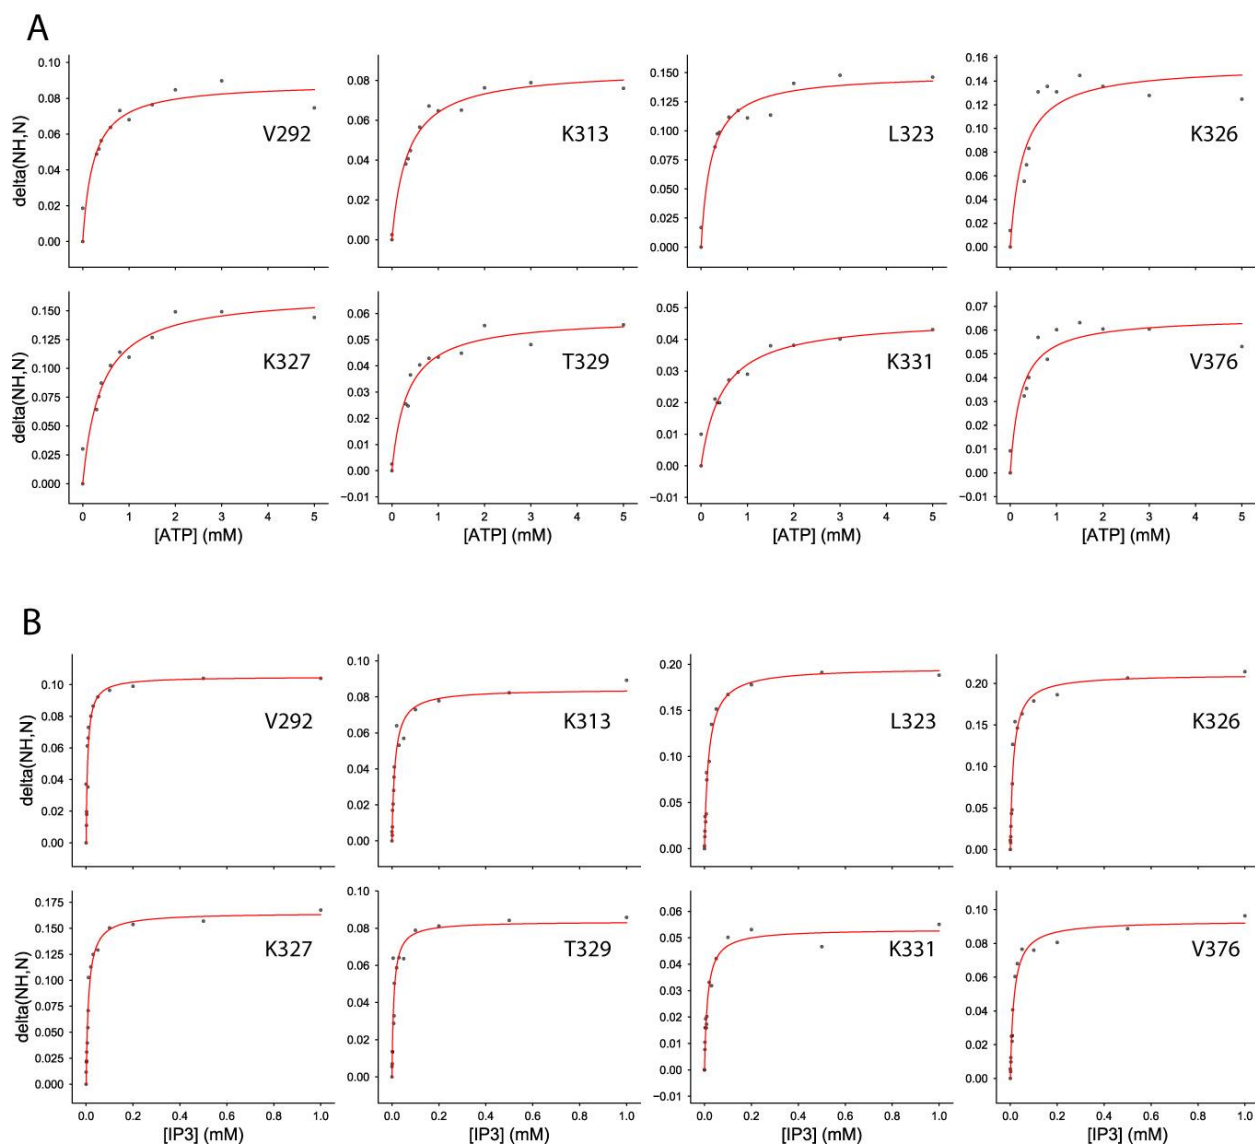

**Figure S3.** Titration curves and fits for binding affinity determination of IP<sub>3</sub> and ATP. Representative fits to determine the dissociation constants of either ATP (**A**) or IP<sub>3</sub> (**B**) at each residue position. Chemical shifts were fit to the equation:  $y = a(bx/(1 + bx))$ ,  $y$  is the chemical shift,  $x$  is the ligand concentration,  $b$  is the reciprocal molar binding constant and  $a$  is a scaling factor.

| protein variant | lipid conditions | metal added      | depth parameter ( $\Phi$ ) | position from lipid phosphate ( $\text{\AA}$ ) |
|-----------------|------------------|------------------|----------------------------|------------------------------------------------|
| fSyt1 173R1     | POPC             | Ca <sup>2+</sup> | -1.9 $\pm$ 0.05            | aqueous                                        |
|                 | POPC:POPS (15%)  | Ca <sup>2+</sup> | 1.03 $\pm$ 0.05            | 7.8                                            |
| sC2AB 173R1     | POPC:POPS (20%)  | Ca <sup>2+</sup> | 1.2 $\pm$ 0.1              | 8.8                                            |
| fSyt1 304R1     | POPC             | Ca <sup>2+</sup> | -2.0 $\pm$ 0.05            | aqueous                                        |
|                 | POPC:POPS (15%)  | Ca <sup>2+</sup> | -0.54 $\pm$ 0.05           | 3.1                                            |
| sC2AB 304R1     | POPC:POPS (20%)  | Ca <sup>2+</sup> | -0.39 $\pm$ 0.2            | 4.3                                            |

**Table S1.** Power saturation and depth data comparing the C2 domains in fSyt1 and sC2AB. Positive position values represent penetration into the phosphate plate. Measurements of fSyt1 reconstituted into POPC or POPC:Chol in the presence or absence of calcium are also aqueous.

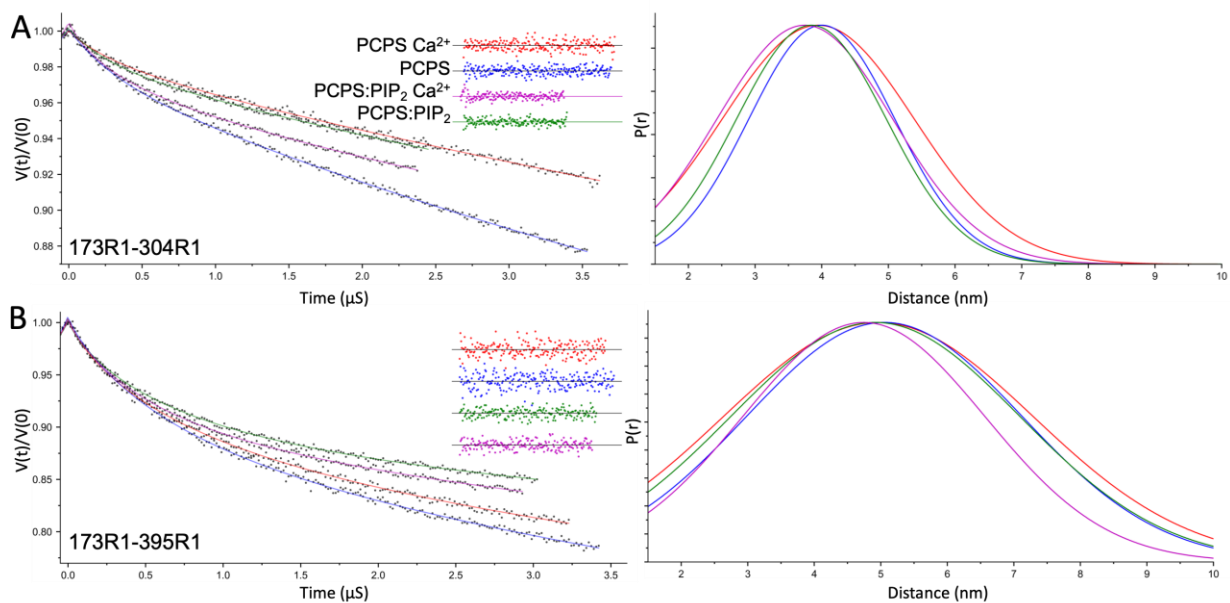

**Figure S4.** DEER data for 173R1-304R1 and 173R1-395R1 in fSyt1 shows broad distributions. (A) Raw DEER data obtained for the 173R1-304R1 spin pair under conditions where fSyt1 is reconstituted into POPC:POPS with bound Ca<sup>2+</sup> (red trace), without calcium (blue trace), with bound Ca<sup>2+</sup> and the addition of PIP<sub>2</sub> containing vesicle (magenta trace) and without Ca<sup>2+</sup> and the addition of PIP<sub>2</sub> containing vesicles (green trace). (B) Raw DEER data obtained for the 173R1-395R1 spin pair under the same conditions as in (A). All data fit with broad single Gaussian distributions using DD (1).

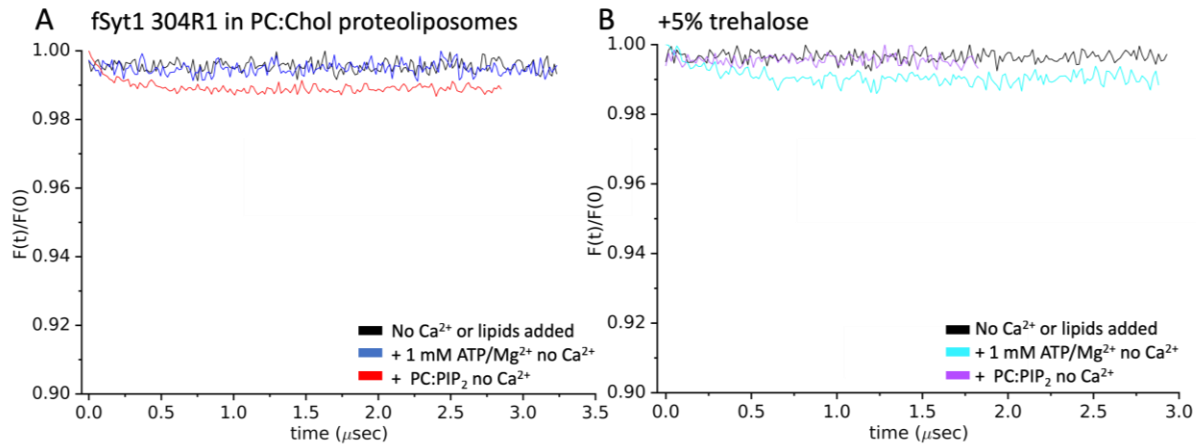

**Figure S5.** DEER data obtained for site 304R1 which show that there is no significant aggregation of fSyt1 C2 domains under a range of conditions. **(A)** Background corrected DEER data obtained for the single label 304R1 for fSyt1 reconstituted into POPC:Chol (80:20) in the absence of  $\text{Ca}^{2+}$  (black trace), 1 mM  $\text{ATP/Mg}^{2+}$  added (blue trace) or with POPC:PIP<sub>2</sub> (95:5) liposomes added (red trace). **(B)** Measurements taken again, but in the presence of 5% trehalose in an attempt to promote oligomerization (ring formation) (2). Here, fSyt1 in POPC:Chol (80:20) with 1 mM  $\text{ATP/Mg}^{2+}$  added (teal trace) or with POPC:PIP<sub>2</sub> (95:5) liposomes added (purple trace). Modulation depths are 1% or less, which is less than 5% of the signal that would have been obtained under these conditions if all the protein assembled into dimers. In addition, we attempted but did not detect interactions for fSyt1 reconstituted into POPC:POPS (85:15) with added POPC:PIP<sub>2</sub> (95:5) vesicles (with or without  $\text{Ca}^{2+}$ ), or for fSyt1 reconstituted into a mixture designed to mimic the plasma membrane lipid composition (POPC:Chol:POPE:POPS:PIP<sub>2</sub>, 36:20:30:15:1) either with or without  $\text{Ca}^{2+}$ .

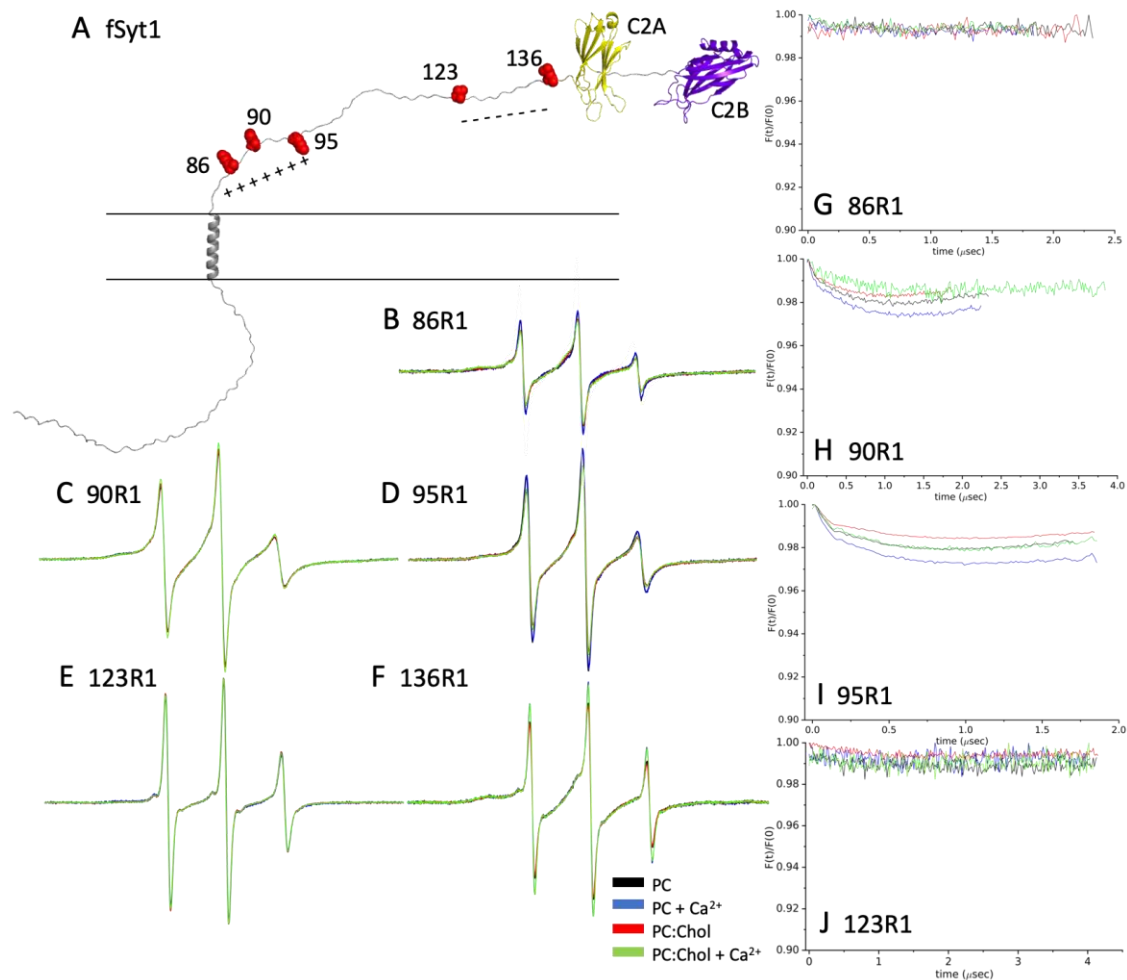

**Figures S6.** EPR CW spectra obtained from sites 86, 90, 95, 123, and 136 in the linker region of fSyt1 near the transmembrane helix show that the linker is largely disordered. (A) Label positions are marked in red. (B) CW EPR of fSyt1 86R1 is broadened in neutral lipid due to proximity to the membrane, as verified by power saturation (Table S2). Measurements were obtained for fSyt1 reconstituted into POPC in the absence of calcium (black line), in the presence of calcium (blue line), or reconstituted into POPC:Chol in the absence of calcium (red line), and in the presence of calcium (green line). (C) fSyt1 90R1, (D) fSyt1 95R1, (E) fSyt1 123R1, (F) fSyt1 136R1 all show mobile EPR lineshapes and are located in the aqueous phase, as verified by power saturation (Table S2). (G) Background corrected DEER data obtained for fSyt1 86R1. Measurements were obtained for fSyt1 reconstituted into POPC in the absence of calcium (black trace), in the presence of calcium (blue trace), or reconstituted into POPC:Chol in the absence of calcium (red trace), and in the presence of calcium (green trace). (H) Background corrected DEER data obtained for fSyt1 90R1, (I) fSyt1 95R1, (J) fSyt1 123R1. The modulation depths on these traces range from less than one to between 2 and 3%. A fully dimerized linker would produce a DEER signal of about 20% modulation depth under the conditions of these experiments. Reconstitution of fSyt1 136R1 yielded a limited amount of material and we did not run DEER on this sample.

| protein variant | lipid conditions | metal added      | depth parameter ( $\Phi$ ) | position from lipid phosphate ( $\text{\AA}$ ) |
|-----------------|------------------|------------------|----------------------------|------------------------------------------------|
| fSyt1 86R1      | POPC             | Ca <sup>2+</sup> | -1.81 $\pm$ 0.1            | -2.59                                          |
|                 | POPC             | EGTA             | -1.76 $\pm$ 0.25           | -2.19                                          |
|                 | POPC:Chol (20%)  | Ca <sup>2+</sup> | -1.80 $\pm$ 0.2            | -2.51                                          |
|                 | POPC:Chol (20%)  | EGTA             | -1.83 $\pm$ 0.1            | -2.75                                          |
| fSyt1 90R1      | POPC             | Ca <sup>2+</sup> | -2.4 $\pm$ 0.1             | aqueous                                        |
|                 | POPC             | EGTA             | -2.4 $\pm$ 0.2             | aqueous                                        |
|                 | POPC:Chol (20%)  | Ca <sup>2+</sup> | -2.4 $\pm$ 0.1             | aqueous                                        |
|                 | POPC:Chol (20%)  | EGTA             | -2.5 $\pm$ 0.2             | aqueous                                        |
| fSyt1 95R1      | POPC             | Ca <sup>2+</sup> | -2.3 $\pm$ 0.1             | aqueous                                        |
|                 | POPC             | EGTA             | -2.4 $\pm$ 0.1             | aqueous                                        |
|                 | POPC:Chol (20%)  | Ca <sup>2+</sup> | -2.7 $\pm$ 0.1             | aqueous                                        |
|                 | POPC:Chol (20%)  | EGTA             | -2.6 $\pm$ 0.05            | aqueous                                        |
| fSyt1 123R1     | POPC             | Ca <sup>2+</sup> | -2.5 $\pm$ 0.1             | aqueous                                        |
|                 | POPC             | EGTA             | -2.4 $\pm$ 0.05            | aqueous                                        |
|                 | POPC:Chol (20%)  | Ca <sup>2+</sup> | -2.5 $\pm$ 0.1             | aqueous                                        |
|                 | POPC:Chol (20%)  | EGTA             | -2.5 $\pm$ 0.1             | aqueous                                        |
| fSyt1 136R1     | POPC             | Ca <sup>2+</sup> | -2.4 $\pm$ 0.2             | aqueous                                        |
|                 | POPC             | EGTA             | -2.5 $\pm$ 0.05            | aqueous                                        |
|                 | POPC:Chol (20%)  | Ca <sup>2+</sup> | -2.5 $\pm$ 0.1             | aqueous                                        |
|                 | POPC:Chol (20%)  | EGTA             | -2.3 $\pm$ 0.2             | aqueous                                        |

**Table S2.** Power saturation data for sites 86, 90, 95, 123, and 136 in the linker region show initial bilayer contact at site 86 then aqueous measurements beyond. Negative position values represent positions away from the phosphate plane.

## Supporting References

1. Stein, R. A., A. H. Beth, and E. J. Hustedt. 2015. A Straightforward Approach to the Analysis of Double Electron-Electron Resonance Data. *Methods Enzymol* 563:531-567.
2. Zanetti, M. N., O. D. Bello, J. Wang, J. Coleman, Y. Cai, C. V. Sindelar, J. E. Rothman, and S. S. Krishnakumar. 2016. Ring-like oligomers of Synaptotagmins and related C2 domain proteins. *Elife* 5.
